# Supplementary material for: High-Sensitivity Cardiac Troponin T and Cardiovascular Risk After Ischemic Stroke or Transient Ischemic Attack
Source: PubMed Central journal article supplement (PMC11312770; doi:10.1016/j.jacadv.2024.101022), 2024-06-04
Supplement: mmc1.pdf [file mmc1.pdf]

## **Supplemental Appendix**

### High-Sensitivity Cardiac Troponin T and Cardiovascular Risk after Ischemic Stroke or Transient Ischemic Attack

Willeit K et al.

## **SUPPLEMENTAL METHODS**

---

CRP (CRP4, Tina-quant CRP IV), LDL (LDLC3, LDL-Cholesterol Gen.3) and HDL cholesterol (HDLC4, HDL-Cholesterol Gen.4), and creatinine (CREP2 Creatinine plus ver.2) levels were assayed using cobas c systems (Roche Diagnostics). NT-proBNP (Elecsys proBNP II) levels were measured by electrochemiluminescence immunoassay on cobas e immunoassay analyzer (Roche Diagnostics). eGFR was calculated using the 4-variable Modification of Diet in Renal Disease (MDRD) Study estimating equation<sup>1</sup>.

## **REFERENCE**

1. Levey AS, Coresh J, Greene T, et al. Using standardized serum creatinine values in the modification of diet in renal disease study equation for estimating glomerular filtration rate. *Ann Intern Med.* 2006;145:247–254.

## SUPPLEMENTAL TABLES

**SUPPLEMENTAL TABLE 1** Comparison of characteristics of patients included in the present analysis and those not included.

| Variable                                    | Patients included<br>in the present analysis<br>(n=1687) | Patients <b>not</b> included<br>in the present analysis<br>(n=43) | P value <sup>a</sup> |
|---------------------------------------------|----------------------------------------------------------|-------------------------------------------------------------------|----------------------|
| Ischemic stroke vs. TIA as qualifying event | 1398 (82.9%)                                             | 26 (60.5%)                                                        | <0.001               |
| TOAST classification                        |                                                          |                                                                   | <0.001               |
| Large-artery atherosclerosis                | 336 (19.9%)                                              | 24 (55.8%)                                                        |                      |
| Cardiac embolism                            | 437 (25.9%)                                              | 6 (14.0%)                                                         |                      |
| Small-artery occlusion                      | 357 (21.2%)                                              | 4 (9.3%)                                                          |                      |
| Uncommon causes                             | 71 (4.2%)                                                | 5 (11.6%)                                                         |                      |
| Undetermined causes                         | 486 (28.8%)                                              | 4 (9.3%)                                                          |                      |
| Admission NIHSS score >5                    | 383 (22.7%)                                              | 5 (11.6%)                                                         | 0.086                |
| Discharge modified Rankin Scale             |                                                          |                                                                   | 0.16                 |
| No symptoms                                 | 537 (31.8%)                                              | 19 (44.2%)                                                        |                      |
| No significant disability                   | 348 (20.6%)                                              | 8 (18.6%)                                                         |                      |
| Slight disability                           | 462 (27.4%)                                              | 8 (18.6%)                                                         |                      |
| Moderate disability                         | 234 (13.9%)                                              | 3 (7.0%)                                                          |                      |
| Moderately severe disability                | 106 (6.3%)                                               | 5 (11.6%)                                                         |                      |
| Age (years)                                 | 69.3±13.7                                                | 70.8±11.8                                                         | 0.48                 |
| Female sex                                  | 687 (40.7%)                                              | 12 (27.9%)                                                        | 0.091                |

<sup>a</sup>P values were calculated using  $\chi^2$ -tests or two-sample independent t-tests. NIHSS = National Institutes of Health Stroke Scale; TIA = transient ischemic attack.

## SUPPLEMENTAL FIGURES

**SUPPLEMENTAL FIGURE 1** Distribution of time points of intrahospital hs-cTnT measurements (upper graph) and marginal scatter plot of hs-cTnT values measured at admission vs. hs-cTnT values measured closest to discharge (lower graph).

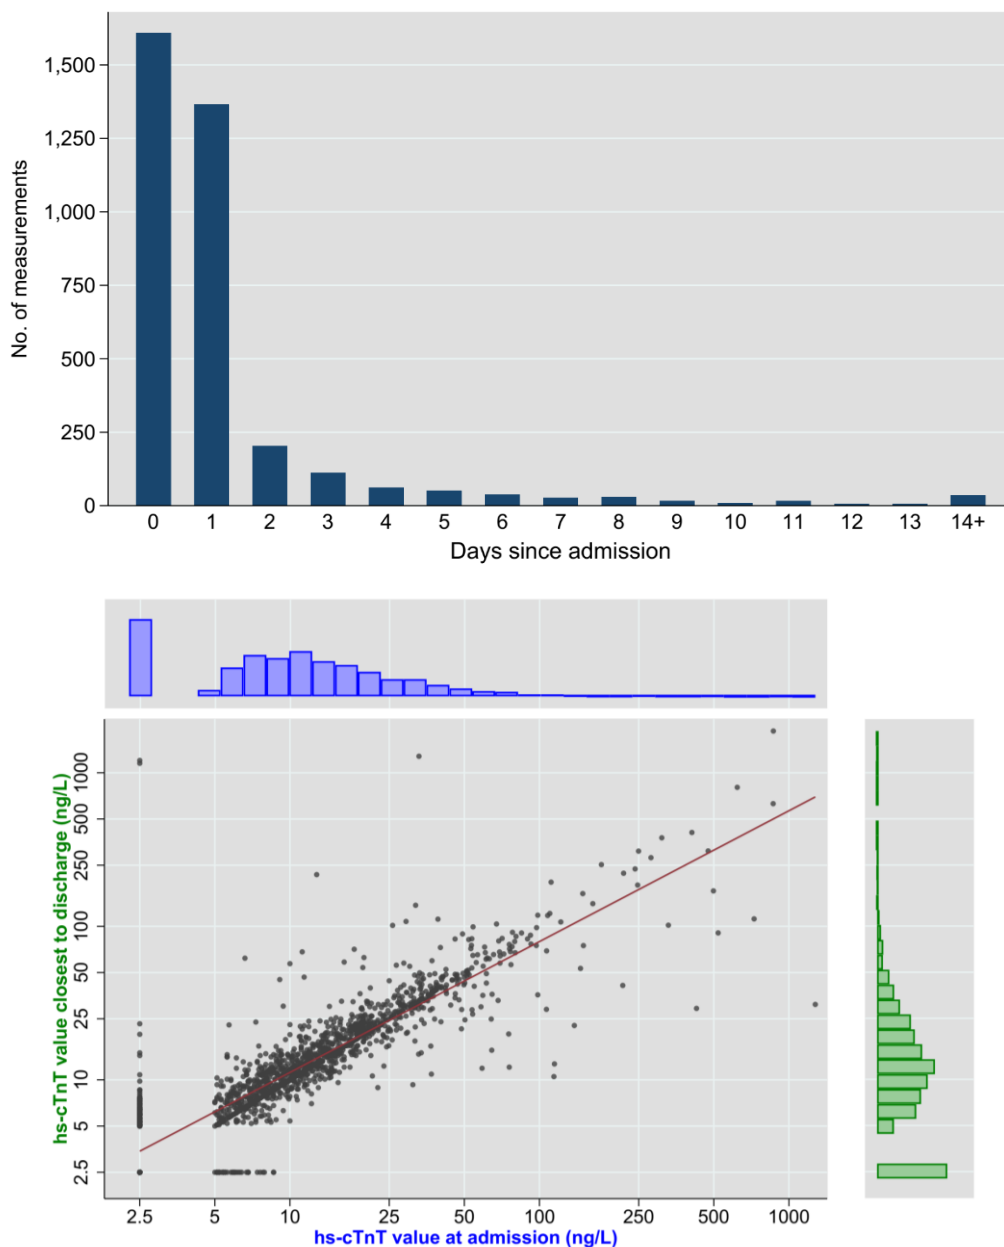

In total, 3588 measurements of hs-cTnT were performed in 1687 patients. The age- and sex-adjusted partial correlation coefficient of log-transformed hs-cTnT values measured at admission vs. closest to discharge was 0.834 (95% CI: 0.819 to 0.848;  $P < 0.001$ ). The histogram with bars in blue color shows the distribution of hs-cTnT values at admission and the histogram with bars in green color shows the distribution of hs-cTnT values closest to discharge. Hs-cTnT = high-sensitivity cardiac troponin T.

**SUPPLEMENTAL FIGURE 2 Comparison of the strength of association of hs-cTnT with the combined CVD endpoint to other cardiovascular risk markers.**

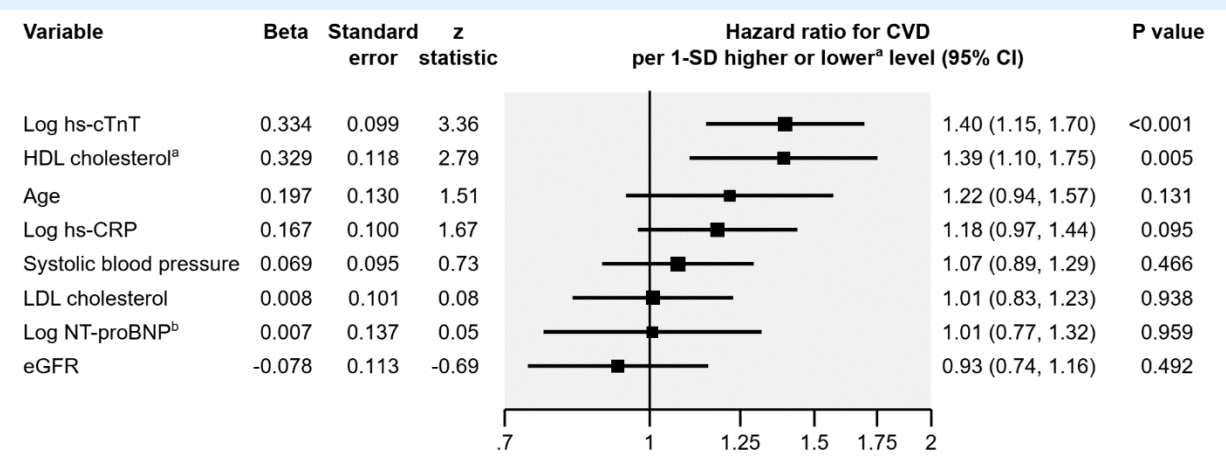

<sup>a</sup>To enable direct comparisons of magnitudes of associations, the hazard ratios presented in this figure are expressed for a 1-standard deviation higher value of each of variables listed herein, except for the hazard ratio for high-density-lipoprotein cholesterol, which is expressed for a 1-standard deviation lower value. <sup>b</sup>Analysis of NT-proBNP involved 1547 patients and 99 CVD events; for head-to-head comparison, the multivariable adjusted hazard ratio of ln hs-cTnT in the same subset of patients was 1.36 (1.07-1.72; P=0.011), the beta coefficient was 0.307 (standard error 0.121) and the z statistic was 2.54. CVD = cardiovascular disease; eGFR = estimated glomerular filtration rate; HDL = high-density-lipoprotein; LDL, low-density-lipoprotein; hs-CRP = high-sensitivity C-reactive protein; hs-cTnT = high-sensitivity cardiac troponin T; NT-proBNP = N-terminal pro-B-type natriuretic peptide.

**SUPPLEMENTAL FIGURE 3 Association of hs-cTnT with the risk of the combined CVD**

**endpoint across pre-specified subgroups**

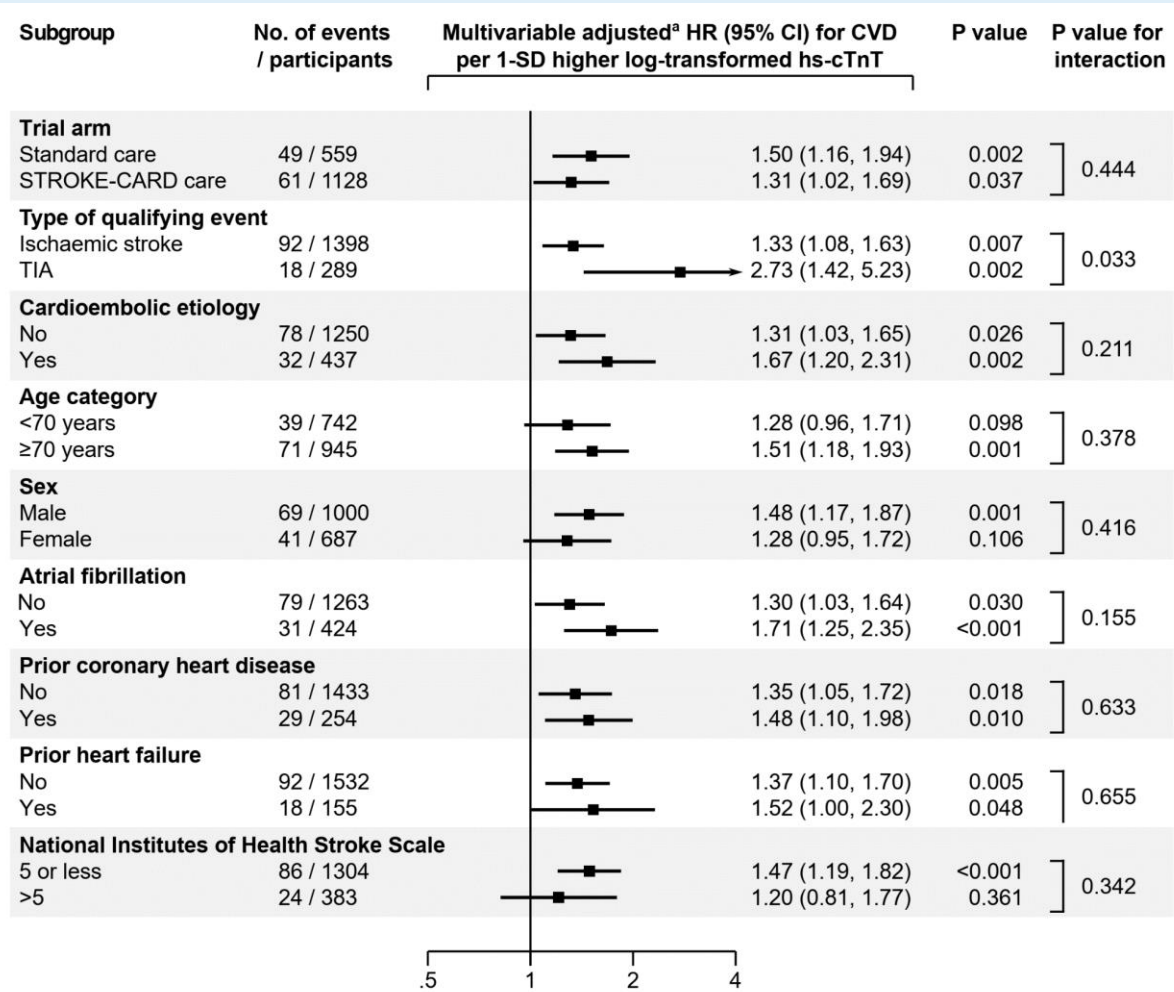

For this subgroup analysis, a Bonferroni-corrected significance level of  $P < 0.0056$  was used. <sup>a</sup>Adjusted for age, sex, prior coronary heart disease, prior heart failure, diabetes, smoking, systolic blood pressure, and low- and high-density-lipoprotein cholesterol, unless the variable was used as a subgroup variable. CVD = cardiovascular disease; hs-cTnT = high-sensitivity cardiac troponin T; TIA = transient ischemic attack.
